# Supplementary material
Source: Springer Nature journal article supplement (https://www.springermedizin.de/resource/supplementary/12950_2011_291_MOESM3_ESM.pdf/9557478)

**1 2 3 4 5 6**

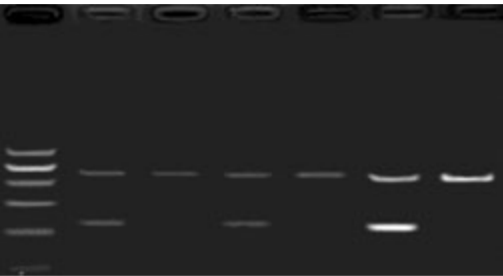

**SP-A (439 bp)**

**Apa I (217/222 bp)**

**M A P A P A P**

Supplement: MOESM3 [file 9557478]
